# Supplementary material for: Fabrication of a new biosensor based on a Sn doped ceria nanoparticle modified glassy carbon paste electrode for the selective determination of the anticancer drug dacarbazine in pharmaceuticals
Source: Royal Society of Chemistry journal article supplement (doi:10.1039/c7ra04331g), 2017-01-01
Supplement: c7ra04331g1.pdf [file c7ra04331g1.pdf]

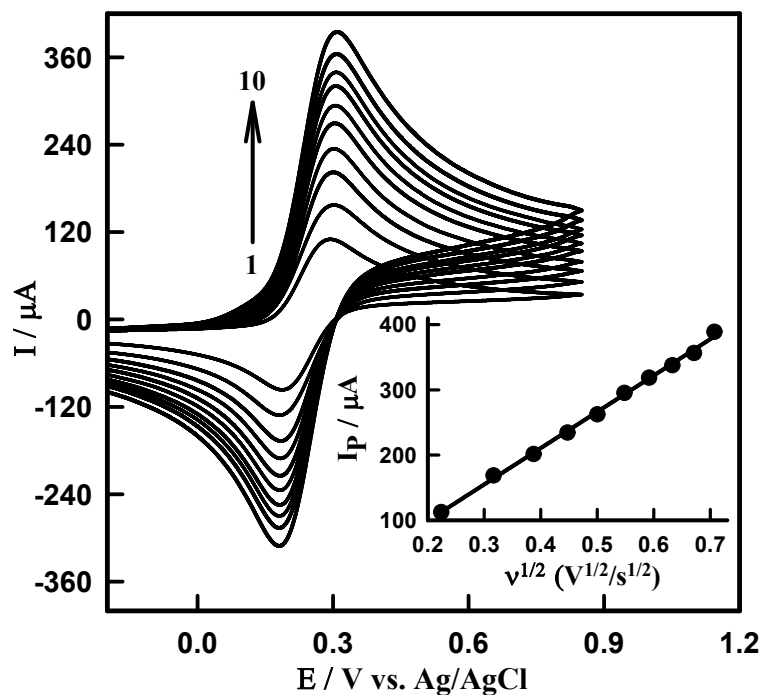

**Fig.S1:** CV profiles of the Sn-CeO<sub>2</sub>NPs/GCPE in 5 mM [Fe(CN)<sub>6</sub>]<sup>-3/-4</sup> with different scan rates (0.05,0.10,0.15,0.20,0.25,0.30,0.35,0.40,0.45 and 0.50 Vs<sup>-1</sup>). The inset shows the plot of dependence of  $I_p$  on  $v^{1/2}$  at Sn-CeO<sub>2</sub>NPs/GCPE

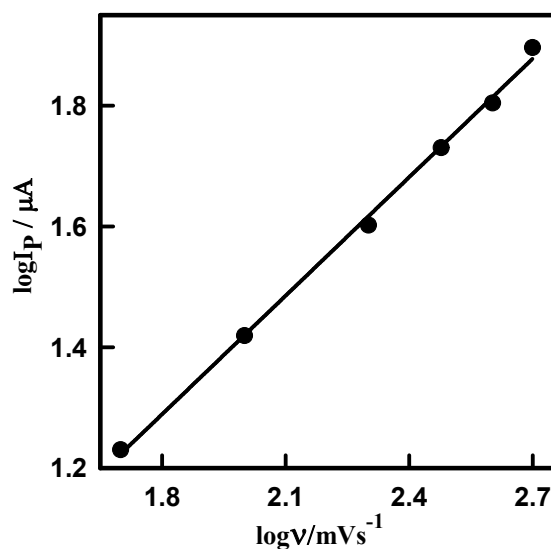

**Fig.S2:** Plot of  $\text{Log } I_p$  versus  $\text{Log } v$

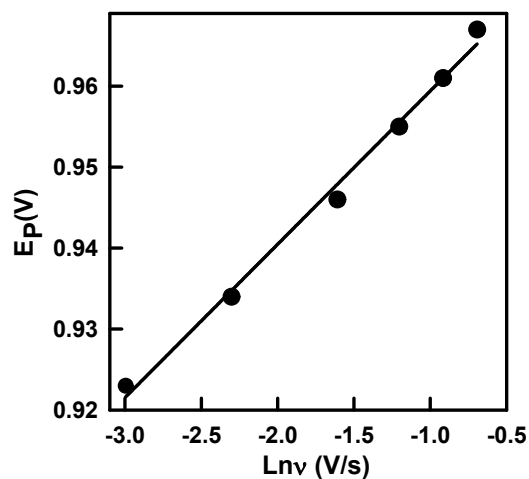

**Fig. S3:** Plot of  $E_p$  versus  $\text{Ln}v$

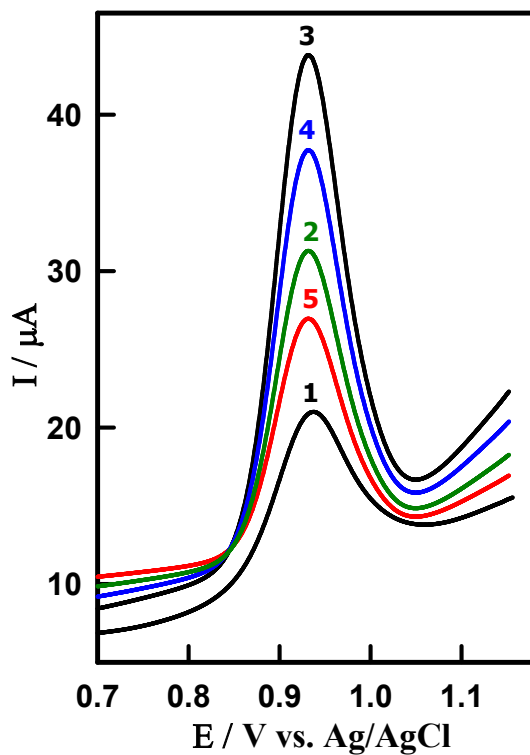

**Fig. S4:** The effect of glassy carbon paste composition with different percentage of the modifier on SW voltammograms of  $1.14\mu\text{M}$  DTIC; (1) 0.0%, (2) 5%, (3) 10%, (4) 15% and (5) 20% Sn-CeO<sub>2</sub>NPs. Other conditions are the same in Fig.4B.

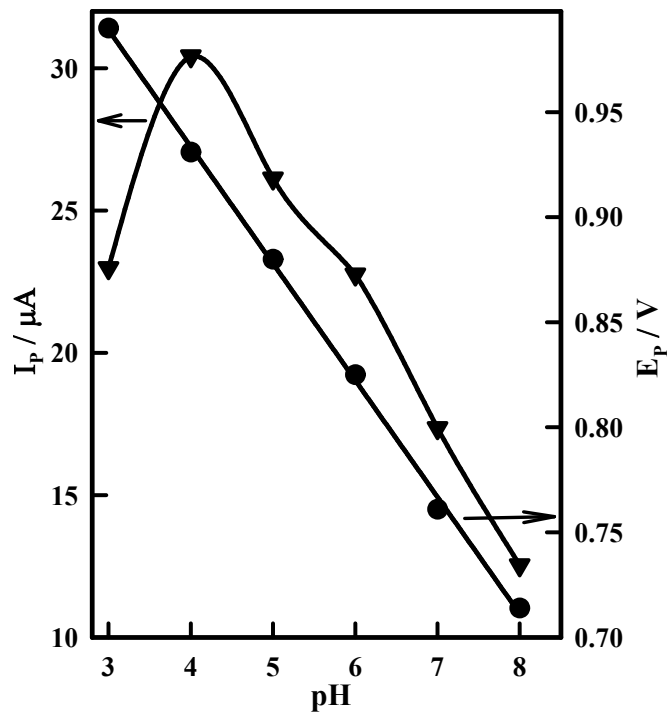

**Fig.S5:** Effect of pH on  $E_p$ (●) and  $I_p$ (▲)

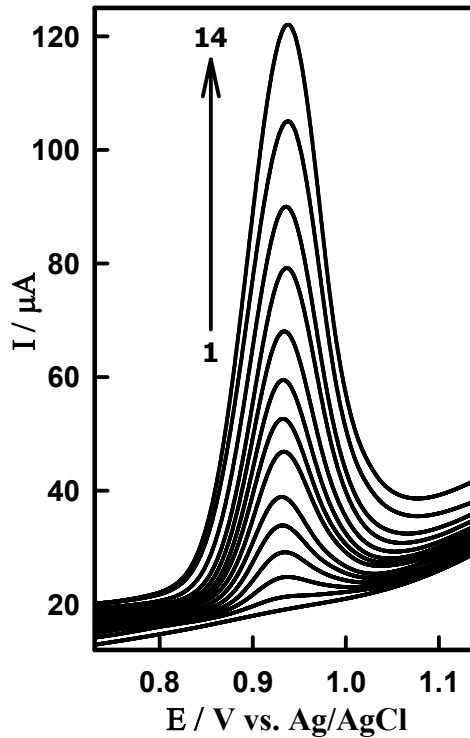

**Fig.S6:** SW voltammograms for determination of DTIC spiked in human serum samples in PBS of pH4.0 at Sn-CeO<sub>2</sub>NPs/GCPE. [DTIC] (1)

blank: 2) 0.076, 3) 0.31, 4) 0.59, 5) 0.79, 6) 1.08, 7) 1.57, 8) 1.99, 9) 2.53, 10) 3.15, 11) 3.73, 12) 4.39, 13) 5.41 and 14) 6.59  $\mu\text{M}$ .

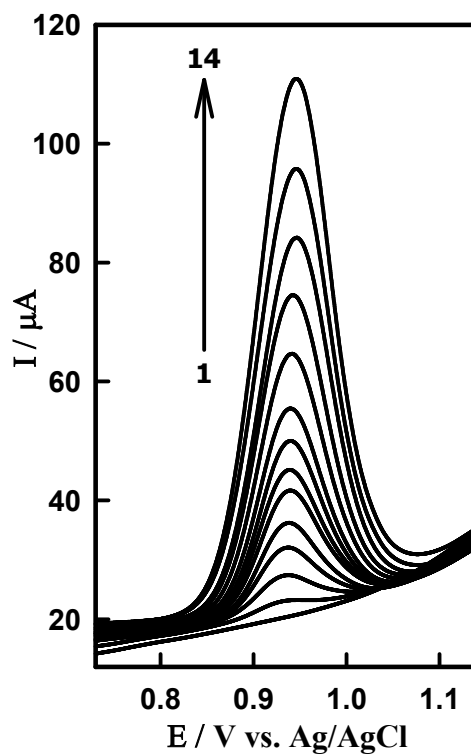

**Fig.S7:** SW voltammograms for determination of DTIC spiked in human urine samples in PBS of pH4.0 at Sn-CeO<sub>2</sub>NPs/GCPE. [DTIC] (1) blank: 2) 0.069, 3) 0.32, 4) 0.59, 5) 0.79, 6) 1.02, 7) 1.25, 8) 1.57, 9) 1.96, 10) 2.50, 11) 2.98, 12) 3.52, 13) 4.27 and 14) 5.31  $\mu\text{M}$ .

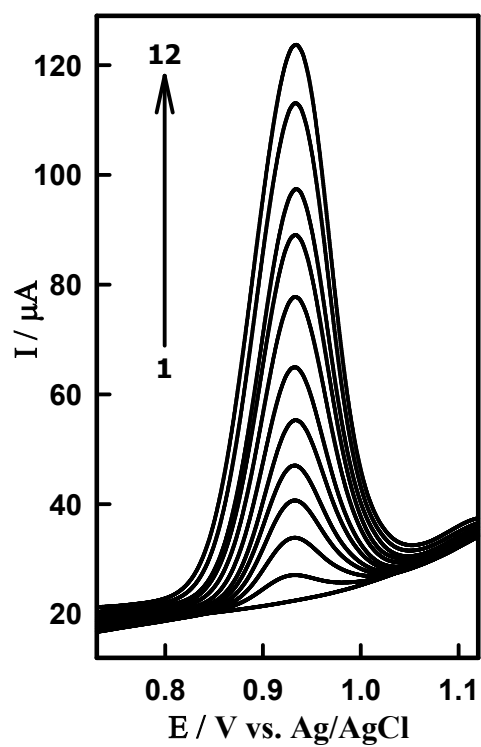

**Fig.S8:** (A) SW voltammograms for determination of DTIC in vial samples at Sn-CeO<sub>2</sub>NPs/GCPE. (1) blank, 2) vial sample: 3) (2) + 0.4, 4) (2) + 0.69, 5) (2) + 1.04, 6) (2) + 1.45, 7) (2) + 2.02, 8) (2) + 2.73, 9) (2) + 3.52, 10) (2) + 4.03, 11) (2) + 4.91, 12) (2) + 5.44 μM DTIC.

**Table S1:**

Influence of interferents on the voltammetric responses of 1.18  $\mu\text{M}$  DTIC at Sn-CeO<sub>2</sub>NPs/GCPE

| Interferent   | Concentration ( $\mu\text{M}$ ) | Recovery % |
|---------------|---------------------------------|------------|
| Ascorbic acid | 250                             | 98.39      |
| Uric Acid     | 200                             | 98.86      |
| Dopamine      | 150                             | 97.88      |
| Alanine       | 300                             | 102.12     |
| Phenylalanine | 300                             | 101.43     |
| Uracil        | 200                             | 98.55      |
| Cysteine      | 250                             | 98.37      |
| Glucose       | 500                             | 98.87      |
| Citric acid   | 300                             | 99.38      |
| Cytosine      | 100                             | 99.49      |
| Cholesterol   | 100                             | 99.54      |
| Histidine     | 200                             | 98.48      |
| Serine        | 300                             | 99.11      |
| Mannitol      | 350                             | 98.89      |
| Thiourea      | 200                             | 102.17     |

**Table S2:** Recovery of DTIC in serum and urine samples (n=5)

| Added ( $\mu\text{M}$ ) | Found ( $\mu\text{M}$ ) | Precision RSD % | Recovery % |
|-------------------------|-------------------------|-----------------|------------|
| Serum                   |                         |                 |            |
| 0.31                    | $0.30 \pm 0.0064$       | 2.13            | 96.77      |
| 2.53                    | $2.50 \pm 0.047$        | 1.89            | 98.81      |
| 6.59                    | $6.55 \pm 0.110$        | 1.67            | 99.39      |
| Urine                   |                         |                 |            |
| 0.32                    | $0.33 \pm 0.007$        | 2.28            | 103.12     |
| 1.96                    | $1.93 \pm 0.030$        | 1.56            | 98.47      |
| 5.31                    | $5.36 \pm 0.098$        | 1.84            | 100.94     |

**Table S3:** Determination result of DTIC in DTIC vial sample by standard addition method (n=5)

| Added ( $\mu\text{M}$ ) | Found ( $\mu\text{M}$ ) | Recovery % | Precision RSD % |
|-------------------------|-------------------------|------------|-----------------|
| 0.0                     | $1.32 \pm 0.015$        | –          | 1.14            |
| 0.50                    | $1.81 \pm 0.017$        | 98.00      | 0.94            |
| 2.50                    | $3.79 \pm 0.028$        | 98.80      | 0.74            |
| 5.50                    | $6.84 \pm 0.047$        | 100.40     | 0.67            |
